# Supplementary material for: 3D high throughput screening and profiling of embryoid bodies in thermoformed microwell plates
Source: Royal Society of Chemistry journal article supplement (doi:10.1039/c5lc01499a), 2016-01-01
Supplement: c5lc01499a1.pdf [file c5lc01499a1.pdf]

### Supplementary information

Below we describe the (hemispherical) geometry of the microwells and the uniformity of their distribution across the plate.

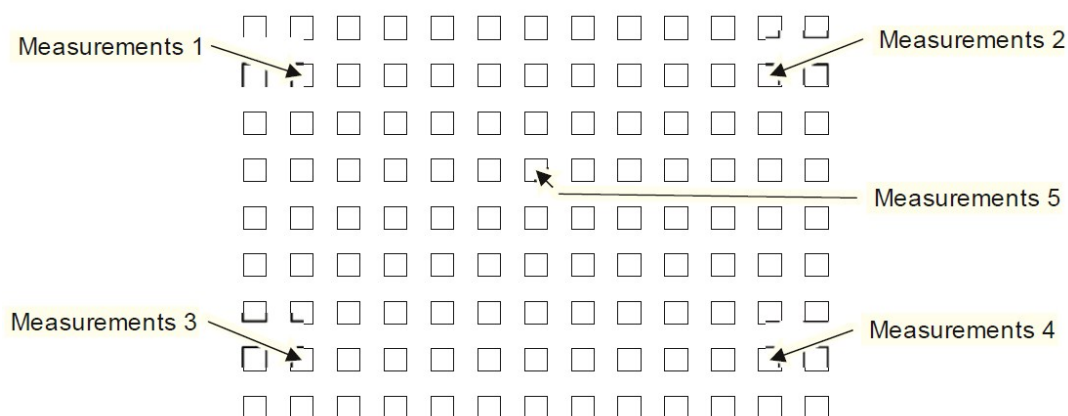

**Supplementary figure 1:** Optical height measurements of micro-thermoformed microwells were performed on different locations of the film.

|                 | Height in $\mu\text{m}$ |          |
|-----------------|-------------------------|----------|
|                 | Sample 1                | Sample 2 |
| Measurements 1: | 253                     | 263      |
| Measurements 2: | 246                     | 253      |
| Measurements 3: | 248                     | 251      |
| Measurements 4: | 275                     | 271      |
| Measurements 5: | 235                     | 234      |

**Supplementary table 1:** The microwells depth of two COP films was optically measured at five different locations and showed an uniform distribution across the film. COP material properties are: Zeonor mcs-foil 051, thickness 50  $\mu\text{m}$ , product code: 10-0682-0000-05, supplier: microfluidic ChipShop.

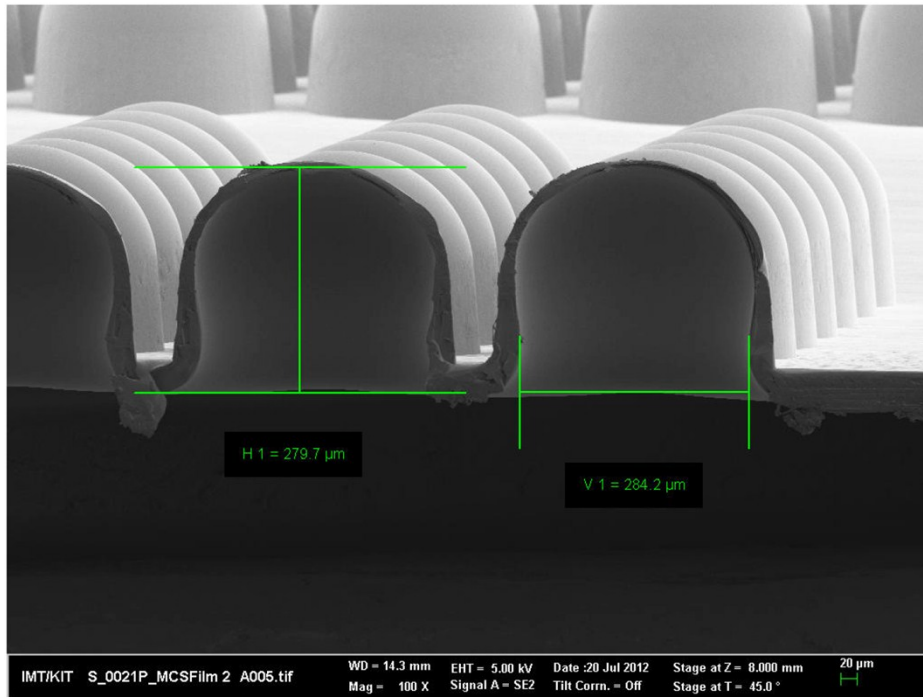

**Supplementary figure 2:** Validation of microwell depth. Sample 2 was cut through one row of microwells at the location of ‘measurements 4’ and the height and width was measured using SEM. The optical measurement of 271  $\mu\text{m}$  correlates with the SEM measurement of 279.7  $\mu\text{m}$ .

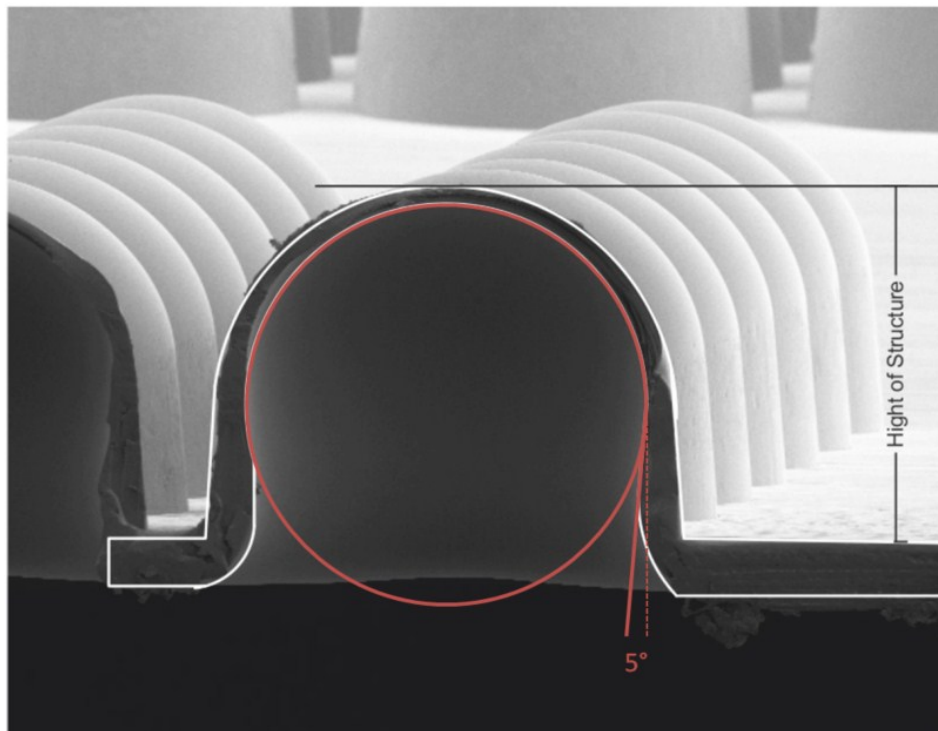

**Supplementary figure 3:** Microwell geometry. The microwell consists of a nearly hemispherical bottom from where the sidewalls are directed inside with a 5 $^\circ$  inclination towards the opening. The aspect ratio of depth/diameter is almost 1.

The yield of EBs positive for PDGFRa-H2B-GFP in positive (RA), negative (2i) and neutral controls (DMSO, H2O) was compared between the thermoformed and the hydrogel plate. The results show a similar trend between the plates.

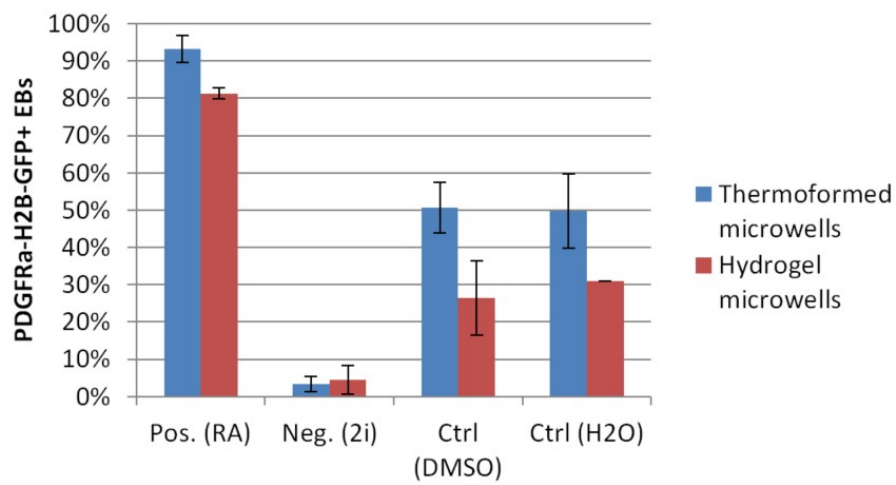

**Supplementary figure 4:** Yield of EBs positive for PDGFRa-H2B-GFP expression compared between plates (measured at 96 hours, n = 3).
